# Supplementary material
Source: Royal Society of Chemistry journal article supplement (doi:10.1039/d6ce00144k)
Supplement: d6ce00144k1.pdf [file d6ce00144k1.pdf]

## Supplementary information to the article

# Formation of “hair” inclusions and growth optimization for large aperture KDP crystals based on numerical simulation method

*Jianyu Bai,<sup>a</sup> Shumo Zhou,<sup>a</sup> Baoan Liu,<sup>\*a</sup> Mingxia Xu,<sup>a</sup> Jianfeng Zhang,<sup>b</sup> Lisong Zhang,<sup>a</sup> Hongkai Ren,<sup>a</sup> Shenglai Wang,<sup>a</sup> Xinguang Xu<sup>a</sup> and Xun Sun<sup>\*a</sup>*

*<sup>a</sup> State Key Laboratory of Crystal Materials, Institute of Crystal Materials, Shandong University, Jinan 250100, China. E-mail: baliu@sdu.edu.cn, sunxun@sdu.edu.cn*

*<sup>b</sup> Research Center of Laser Fusion, China Academy of Engineering Physics, Mianyang 621900, China*

**Table S1.** The complete configuration schedule for L25 ( $5^6$ ) orthogonal experiment.

| Test number | Column 1 | Column 2 | Column 3 | Column 4 | Column 5 | Column 6 |
|-------------|----------|----------|----------|----------|----------|----------|
| 1           | 1        | 1        | 1        | 1        | 1        | 1        |
| 2           | 1        | 2        | 3        | 4        | 5        | 2        |
| 3           | 1        | 3        | 5        | 2        | 4        | 3        |
| 4           | 1        | 4        | 2        | 5        | 3        | 4        |
| 5           | 1        | 5        | 4        | 3        | 2        | 5        |
| 6           | 2        | 1        | 5        | 4        | 3        | 5        |
| 7           | 2        | 2        | 2        | 2        | 2        | 1        |
| 8           | 2        | 3        | 4        | 5        | 1        | 2        |
| 9           | 2        | 4        | 1        | 3        | 5        | 3        |
| 10          | 2        | 5        | 3        | 1        | 4        | 4        |
| 11          | 3        | 1        | 4        | 2        | 5        | 4        |
| 12          | 3        | 2        | 1        | 5        | 4        | 5        |
| 13          | 3        | 3        | 3        | 3        | 3        | 1        |
| 14          | 3        | 4        | 5        | 1        | 2        | 2        |
| 15          | 3        | 5        | 2        | 4        | 1        | 3        |
| 16          | 4        | 1        | 3        | 5        | 2        | 3        |
| 17          | 4        | 2        | 5        | 3        | 1        | 4        |
| 18          | 4        | 3        | 2        | 1        | 5        | 5        |
| 19          | 4        | 4        | 4        | 4        | 4        | 1        |
| 20          | 4        | 5        | 1        | 2        | 3        | 2        |
| 21          | 5        | 1        | 2        | 3        | 4        | 2        |
| 22          | 5        | 2        | 4        | 1        | 3        | 3        |
| 23          | 5        | 3        | 1        | 4        | 2        | 4        |
| 24          | 5        | 4        | 3        | 2        | 1        | 5        |
| 25          | 5        | 5        | 5        | 5        | 5        | 1        |

**Table S2.** Orthogonal experiment results.

| Test number | A | B | C | D | <i>T - C.V</i> ( $\times 10^{-5}$ ) |                 |                 |                 | $\sigma - C.V$ (%) |                 |                 |                 | $\sigma - avg$ (%) |                 |                 |                 |
|-------------|---|---|---|---|-------------------------------------|-----------------|-----------------|-----------------|--------------------|-----------------|-----------------|-----------------|--------------------|-----------------|-----------------|-----------------|
|             |   |   |   |   | PR <sub>x</sub>                     | PR <sub>y</sub> | PY <sub>x</sub> | PY <sub>y</sub> | PR <sub>x</sub>    | PR <sub>y</sub> | PY <sub>x</sub> | PY <sub>y</sub> | PR <sub>x</sub>    | PR <sub>y</sub> | PY <sub>x</sub> | PY <sub>y</sub> |
| 1           | 1 | 1 | 1 | 1 | 0.00                                | 0.00            | 0.00            | 0.00            | 0.62               | 0.40            | 1.07            | 0.55            | 0.26               | 0.26            | 0.24            | 0.25            |
| 2           | 1 | 2 | 3 | 2 | 0.00                                | 0.00            | 0.00            | 0.00            | 1.42               | 1.30            | 10.66           | 7.49            | 2.00               | 2.00            | 1.39            | 1.46            |
| 3           | 1 | 3 | 5 | 3 | 0.00                                | 0.00            | 0.00            | 0.00            | 1.52               | 1.20            | 5.07            | 3.51            | 1.48               | 1.48            | 1.10            | 1.18            |
| 4           | 1 | 4 | 2 | 4 | 0.00                                | 0.00            | 0.00            | 0.00            | 2.32               | 2.30            | 11.06           | 6.06            | 0.99               | 0.99            | 0.59            | 0.67            |
| 5           | 1 | 5 | 4 | 5 | 0.00                                | 0.00            | 0.00            | 0.00            | 1.41               | 1.36            | 5.84            | 3.93            | 0.49               | 0.49            | 0.36            | 0.39            |
| 6           | 2 | 1 | 5 | 5 | 0.31                                | 0.21            | 0.16            | 0.11            | 1.84               | 2.10            | 9.35            | 5.88            | 0.99               | 0.99            | 0.61            | 0.67            |
| 7           | 2 | 2 | 2 | 1 | 1.10                                | 1.18            | 0.57            | 0.64            | 0.49               | 0.39            | 1.33            | 0.80            | 0.45               | 0.46            | 0.43            | 0.43            |
| 8           | 2 | 3 | 4 | 2 | 4.52                                | 4.43            | 1.69            | 1.21            | 1.45               | 1.45            | 2.55            | 0.96            | 0.21               | 0.21            | 0.19            | 0.20            |
| 9           | 2 | 4 | 1 | 3 | 3.59                                | 3.16            | 1.43            | 1.54            | 3.26               | 2.76            | 7.60            | 5.34            | 1.87               | 1.88            | 1.10            | 1.21            |
| 10          | 2 | 5 | 3 | 4 | 6.78                                | 2.99            | 10.71           | 8.28            | 4.82               | 3.60            | 8.34            | 5.34            | 1.39               | 1.42            | 0.86            | 0.98            |
| 11          | 3 | 1 | 4 | 4 | 0.19                                | 0.21            | 0.12            | 0.12            | 2.51               | 2.11            | 7.52            | 5.74            | 1.95               | 1.95            | 1.18            | 1.29            |
| 12          | 3 | 2 | 1 | 5 | 11.45                               | 7.28            | 5.95            | 3.95            | 5.13               | 4.22            | 14.69           | 8.02            | 1.39               | 1.41            | 0.56            | 0.66            |
| 13          | 3 | 3 | 3 | 1 | 2.30                                | 2.03            | 1.13            | 1.10            | 0.58               | 0.56            | 2.33            | 1.45            | 0.92               | 0.92            | 0.83            | 0.85            |
| 14          | 3 | 4 | 5 | 2 | 6.65                                | 4.60            | 9.09            | 6.79            | 2.27               | 1.29            | 4.45            | 1.92            | 0.35               | 0.37            | 0.30            | 0.33            |
| 15          | 3 | 5 | 2 | 3 | 9.30                                | 6.44            | 3.14            | 2.63            | 4.86               | 3.22            | 3.65            | 1.78            | 0.14               | 0.15            | 0.12            | 0.12            |
| 16          | 4 | 1 | 3 | 3 | 6.88                                | 6.74            | 2.43            | 1.68            | 1.69               | 1.75            | 6.53            | 2.84            | 0.46               | 0.46            | 0.36            | 0.39            |
| 17          | 4 | 2 | 5 | 4 | 0.66                                | 0.70            | 0.39            | 0.35            | 0.63               | 0.64            | 2.48            | 1.37            | 0.21               | 0.21            | 0.19            | 0.20            |
| 18          | 4 | 3 | 2 | 5 | 10.72                               | 4.05            | 19.24           | 9.73            | 7.33               | 6.40            | 14.11           | 8.71            | 1.77               | 1.78            | 0.73            | 0.90            |
| 19          | 4 | 4 | 4 | 1 | 15.13                               | 18.07           | 3.09            | 2.53            | 0.95               | 1.11            | 3.78            | 2.05            | 1.39               | 1.40            | 1.18            | 1.24            |
| 20          | 4 | 5 | 1 | 2 | 11.01                               | 10.55           | 4.76            | 5.64            | 2.28               | 1.88            | 3.68            | 1.90            | 0.60               | 0.61            | 0.49            | 0.53            |
| 21          | 5 | 1 | 2 | 2 | 2.56                                | 2.07            | 1.20            | 1.21            | 1.46               | 1.31            | 4.90            | 3.33            | 1.41               | 1.41            | 1.08            | 1.15            |
| 22          | 5 | 2 | 4 | 3 | 6.92                                | 4.41            | 9.99            | 6.74            | 3.47               | 2.30            | 8.73            | 4.49            | 0.78               | 0.78            | 0.52            | 0.59            |
| 23          | 5 | 3 | 1 | 4 | 21.25                               | 12.87           | 6.50            | 6.15            | 8.02               | 4.78            | 7.85            | 3.55            | 0.23               | 0.25            | 0.16            | 0.18            |
| 24          | 5 | 4 | 3 | 5 | 6.47                                | 3.82            | 16.35           | 6.42            | 4.55               | 2.56            | 16.51           | 4.69            | 0.13               | 0.14            | 0.09            | 0.11            |
| 25          | 5 | 5 | 5 | 1 | 30.80                               | 26.62           | 11.36           | 8.24            | 1.36               | 1.41            | 6.87            | 3.02            | 1.86               | 1.87            | 1.47            | 1.59            |

**Table S3.** Range analysis results for indicator of  $T - C.V.$

Unit:  $\times 10^{-5}$

|                         | PR <sub>x</sub> |       |       |       | PR <sub>y</sub> |       |       |       | PY <sub>x</sub> |       |       |       | PY <sub>y</sub> |       |       |       |
|-------------------------|-----------------|-------|-------|-------|-----------------|-------|-------|-------|-----------------|-------|-------|-------|-----------------|-------|-------|-------|
|                         | A               | B     | C     | D     | A               | B     | C     | D     | A               | B     | C     | D     | A               | B     | C     | D     |
| <b>K1</b>               | 0.00            | 9.93  | 47.29 | 49.32 | 0.00            | 9.22  | 33.86 | 47.90 | 0.00            | 3.90  | 18.64 | 16.15 | 0.00            | 3.12  | 17.29 | 12.50 |
| <b>K2</b>               | 16.29           | 20.13 | 23.68 | 24.73 | 11.96           | 13.57 | 13.73 | 21.64 | 14.55           | 16.91 | 24.16 | 16.74 | 11.77           | 11.69 | 14.20 | 14.85 |
| <b>K3</b>               | 29.88           | 38.79 | 22.42 | 26.69 | 20.57           | 23.39 | 15.58 | 20.73 | 19.43           | 28.56 | 30.62 | 16.98 | 14.58           | 18.18 | 17.47 | 12.59 |
| <b>K4</b>               | 44.40           | 31.84 | 26.76 | 28.88 | 40.11           | 29.64 | 27.12 | 16.78 | 29.91           | 29.95 | 14.88 | 17.72 | 19.93           | 17.27 | 10.60 | 14.91 |
| <b>K5</b>               | 68.00           | 57.89 | 38.42 | 28.95 | 49.78           | 46.59 | 32.12 | 15.36 | 45.40           | 29.97 | 20.99 | 41.70 | 28.76           | 24.79 | 15.49 | 20.21 |
| <b>K1<sub>avg</sub></b> | 0.00            | 1.99  | 9.46  | 9.86  | 0.00            | 1.84  | 6.77  | 9.58  | 0.00            | 0.78  | 3.73  | 3.23  | 0.00            | 0.62  | 3.46  | 2.50  |
| <b>K2<sub>avg</sub></b> | 3.26            | 4.03  | 4.74  | 4.95  | 2.39            | 2.71  | 2.75  | 4.33  | 2.91            | 3.38  | 4.83  | 3.35  | 2.35            | 2.34  | 2.84  | 2.97  |
| <b>K3<sub>avg</sub></b> | 5.98            | 7.76  | 4.48  | 5.34  | 4.11            | 4.68  | 3.12  | 4.15  | 3.89            | 5.71  | 6.12  | 3.40  | 2.92            | 3.64  | 3.49  | 2.52  |
| <b>K4<sub>avg</sub></b> | 8.88            | 6.37  | 5.35  | 5.78  | 8.02            | 5.93  | 5.42  | 3.36  | 5.98            | 5.99  | 2.98  | 3.54  | 3.99            | 3.45  | 2.12  | 2.98  |
| <b>K5<sub>avg</sub></b> | 13.60           | 11.58 | 7.68  | 5.79  | 9.96            | 9.32  | 6.42  | 3.07  | 9.08            | 5.99  | 4.20  | 8.34  | 5.75            | 4.96  | 3.10  | 4.04  |
| <b>R</b>                | 13.60           | 9.59  | 4.97  | 4.92  | 9.96            | 7.47  | 4.03  | 6.51  | 9.08            | 5.21  | 3.15  | 5.11  | 5.75            | 4.33  | 1.38  | 1.54  |

**Table S4.** Range analysis results for indicator of  $\sigma$  - *C.V.*

|                         | Unit: %         |       |       |       |                 |       |       |       |                 |       |       |       |                 |       |       |       |
|-------------------------|-----------------|-------|-------|-------|-----------------|-------|-------|-------|-----------------|-------|-------|-------|-----------------|-------|-------|-------|
|                         | PR <sub>x</sub> |       |       |       | PR <sub>y</sub> |       |       |       | PY <sub>x</sub> |       |       |       | PY <sub>y</sub> |       |       |       |
|                         | A               | B     | C     | D     | A               | B     | C     | D     | A               | B     | C     | D     | A               | B     | C     | D     |
| <b>K1</b>               | 7.29            | 8.11  | 19.31 | 3.99  | 6.56            | 7.67  | 14.06 | 3.87  | 33.71           | 29.38 | 34.88 | 15.38 | 21.54           | 18.34 | 19.36 | 7.87  |
| <b>K2</b>               | 11.86           | 11.14 | 16.45 | 8.88  | 10.30           | 8.86  | 13.63 | 7.23  | 29.17           | 37.90 | 35.07 | 26.25 | 18.32           | 22.16 | 20.67 | 15.60 |
| <b>K3</b>               | 15.35           | 18.91 | 13.07 | 14.79 | 11.41           | 14.40 | 9.76  | 11.23 | 32.63           | 31.92 | 44.37 | 31.58 | 18.92           | 18.19 | 21.81 | 17.95 |
| <b>K4</b>               | 12.87           | 13.35 | 9.79  | 18.30 | 11.78           | 10.01 | 8.32  | 13.43 | 30.59           | 43.40 | 28.44 | 37.27 | 16.87           | 20.06 | 17.18 | 22.07 |
| <b>K5</b>               | 18.86           | 14.72 | 7.61  | 20.27 | 12.36           | 11.49 | 6.65  | 16.65 | 44.87           | 28.38 | 28.21 | 60.50 | 19.07           | 15.97 | 15.70 | 31.23 |
| <b>K1<sub>avg</sub></b> | 1.46            | 1.62  | 3.86  | 0.80  | 1.31            | 1.53  | 2.81  | 0.77  | 6.74            | 5.88  | 6.98  | 3.08  | 4.31            | 3.67  | 3.87  | 1.57  |
| <b>K2<sub>avg</sub></b> | 2.37            | 2.23  | 3.29  | 1.78  | 2.06            | 1.77  | 2.73  | 1.45  | 5.83            | 7.58  | 7.01  | 5.25  | 3.66            | 4.43  | 4.13  | 3.12  |
| <b>K3<sub>avg</sub></b> | 3.07            | 3.78  | 2.61  | 2.96  | 2.28            | 2.88  | 1.95  | 2.25  | 6.53            | 6.38  | 8.87  | 6.32  | 3.78            | 3.64  | 4.36  | 3.59  |
| <b>K4<sub>avg</sub></b> | 2.57            | 2.67  | 1.96  | 3.66  | 2.36            | 2.00  | 1.66  | 2.69  | 6.12            | 8.68  | 5.69  | 7.45  | 3.37            | 4.01  | 3.44  | 4.41  |
| <b>K5<sub>avg</sub></b> | 3.77            | 2.94  | 1.52  | 4.05  | 2.47            | 2.30  | 1.33  | 3.33  | 8.97            | 5.68  | 5.64  | 12.10 | 3.81            | 3.19  | 3.14  | 6.25  |
| <b>R</b>                | 2.31            | 2.16  | 2.34  | 3.26  | 1.16            | 1.35  | 1.48  | 2.55  | 3.14            | 3.00  | 3.23  | 9.03  | 0.93            | 1.24  | 1.22  | 4.67  |

**Table S5.** Range analysis results for indicator of  $\sigma$  - avg.

|                         | Unit: % |      |      |      |      |      |      |      |      |      |      |      |      |      |      |      |
|-------------------------|---------|------|------|------|------|------|------|------|------|------|------|------|------|------|------|------|
|                         | PRx     |      |      |      | PRy  |      |      |      | PYx  |      |      |      | PYy  |      |      |      |
|                         | A       | B    | C    | D    | A    | B    | C    | D    | A    | B    | C    | D    | A    | B    | C    | D    |
| <b>K1</b>               | 5.22    | 5.07 | 4.35 | 4.88 | 5.22 | 5.07 | 4.41 | 4.91 | 3.68 | 3.47 | 2.55 | 4.15 | 3.95 | 3.75 | 2.83 | 4.36 |
| <b>K2</b>               | 4.91    | 4.83 | 4.76 | 4.57 | 4.96 | 4.86 | 4.79 | 4.60 | 3.19 | 3.09 | 2.95 | 3.45 | 3.49 | 3.34 | 3.27 | 3.67 |
| <b>K3</b>               | 4.75    | 4.61 | 4.90 | 4.73 | 4.80 | 4.64 | 4.94 | 4.75 | 2.99 | 3.01 | 3.53 | 3.20 | 3.25 | 3.31 | 3.79 | 3.49 |
| <b>K4</b>               | 4.43    | 4.73 | 4.82 | 4.77 | 4.46 | 4.78 | 4.83 | 4.82 | 2.95 | 3.26 | 3.43 | 2.98 | 3.26 | 3.56 | 3.71 | 3.32 |
| <b>K5</b>               | 4.41    | 4.48 | 4.89 | 4.77 | 4.45 | 4.54 | 4.92 | 4.81 | 3.32 | 3.30 | 3.67 | 2.35 | 3.62 | 3.61 | 3.97 | 2.73 |
| <b>K1<sub>avg</sub></b> | 1.04    | 1.01 | 0.87 | 0.98 | 1.04 | 1.01 | 0.88 | 0.98 | 0.74 | 0.69 | 0.51 | 0.83 | 0.79 | 0.75 | 0.57 | 0.87 |
| <b>K2<sub>avg</sub></b> | 0.98    | 0.97 | 0.95 | 0.91 | 0.99 | 0.97 | 0.96 | 0.92 | 0.64 | 0.62 | 0.59 | 0.69 | 0.70 | 0.67 | 0.65 | 0.73 |
| <b>K3<sub>avg</sub></b> | 0.95    | 0.92 | 0.98 | 0.95 | 0.96 | 0.93 | 0.99 | 0.95 | 0.60 | 0.60 | 0.71 | 0.64 | 0.65 | 0.66 | 0.76 | 0.70 |
| <b>K4<sub>avg</sub></b> | 0.89    | 0.95 | 0.96 | 0.95 | 0.89 | 0.96 | 0.97 | 0.96 | 0.59 | 0.65 | 0.69 | 0.60 | 0.65 | 0.71 | 0.74 | 0.66 |
| <b>K5<sub>avg</sub></b> | 0.88    | 0.90 | 0.98 | 0.95 | 0.89 | 0.91 | 0.98 | 0.96 | 0.66 | 0.66 | 0.73 | 0.47 | 0.72 | 0.72 | 0.79 | 0.55 |
| <b>R</b>                | 0.16    | 0.12 | 0.11 | 0.06 | 0.15 | 0.11 | 0.11 | 0.06 | 0.15 | 0.09 | 0.22 | 0.36 | 0.14 | 0.09 | 0.23 | 0.33 |

Note: The calculation formulas are as follows:  $K_i^j = \sum_{t=1}^5 xt$ ,  $Ki_{avg}^j = Ki^j/5$ ,  $R = \max\{Ki_{avg}^j\} - \min\{Ki_{avg}^j\}$ ;  $i = 1, 2, 3, 4, 5$ ;  $j = A, B, C, D$ ;  $xt$  represents the results for different indicators, specifically including: coefficient of variation for crystal surface temperature ( $T - C.V$ ) and supersaturation ( $\sigma - C.V$ ), average surface supersaturation ( $\sigma - avg$ ); PR and PY indicate the prismatic and pyramidal faces, respectively. Mark x and y as the long-edge and short-edge.
